# Supplementary material for: The histone chaperone NAP1L3 is required for haematopoietic stem cell maintenance and differentiation
Source: PubMed Central journal article supplement (PMC6060140; doi:10.1038/s41598-018-29518-z), 2018-07-25
Supplement: 41598_2018_29518_MOESM1_ESM.pdf [file 41598_2018_29518_MOESM1_ESM.pdf]

## **Supplementary Information**

### **Article in *Scientific Reports***

#### **The histone chaperone NAP1L3 is required for haematopoietic stem cell maintenance and differentiation**

Yaser Heshmati, Shabnam Kharazi, Gözde Türköz, David Chang, Esmat Kamali Dolatabadi, Johan Boström, Aleksandra Krstic, Theodora Boukoura, Emma Wagner, Nadir Kadri, Robert Månsson, Mikael Altun, Hong Qian, Julian Walfridsson.

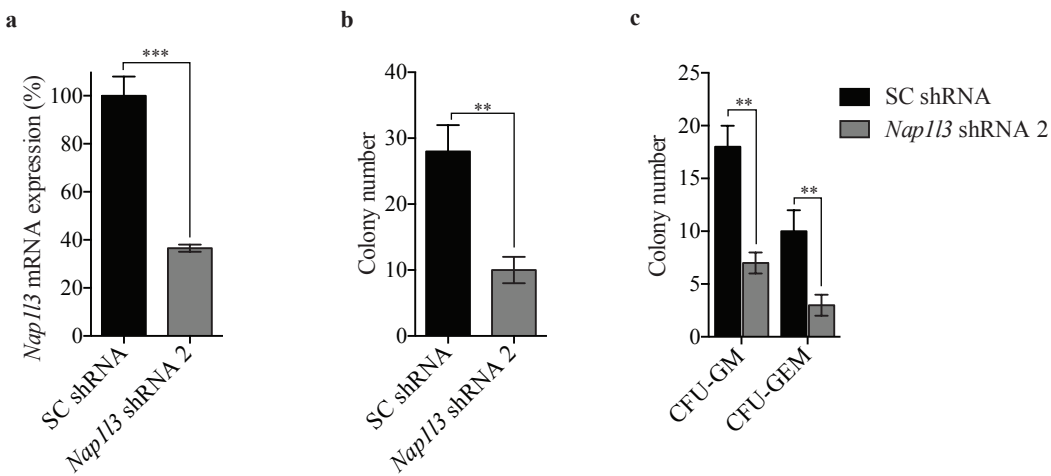

**Supplementary Figure 1. Nap113 downregulation impairs colony-forming capacity.**

**A.** qPCR analysis showing Nap113 mRNA levels (normalized to Hprt) of sorted LSK HSCs transduced with an shRNA against Nap113 (Nap113 shRNA), or a control vector (SC shRNA). The data is represented as the mean  $\pm$ s.e.m, \*\* $p < 0.01$ , \*\*\* $p < 0.005$  (unpaired t-test),  $n = 3$ . **B** and **C.** Bar graph showing the total colony numbers (B), and colony numbers of CFU-GM and CFU-GEM (C), formed from LSK HSCs transduced with Nap113 shRNA (Nap113 shRNA) or a control vector (SC shRNA) after ten days of clonal growth in methylcellulose. \*\* $p < 0.01$ , \*\*\* $p < 0.005$ , \*\*\*\* $p < 0.001$  (unpaired t-test),  $n = 3$ .

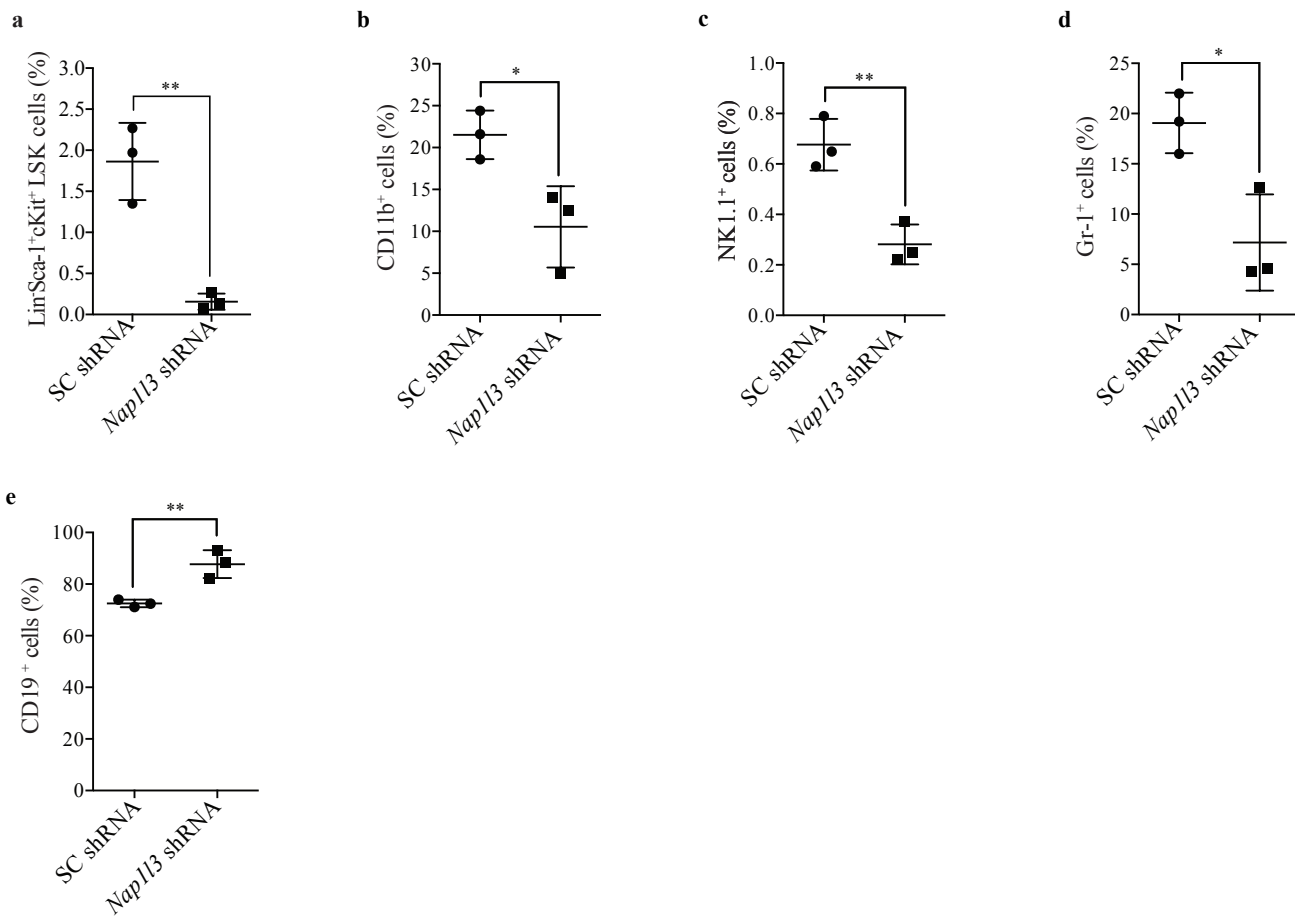

**Supplementary Figure 2. Nap113 downregulation impairs maintenance of murine HSCs and blood lineage regeneration.**

Percentage of donor derived LSK HSCs (A), or mature donor cells; CD11b<sup>+</sup> myeloid (B), NK1.1<sup>+</sup> NK cells (C), Gr-1<sup>+</sup> granulocytes (D), and CD19<sup>+</sup> B cells (E), transduced with shRNAs against Nap113 or a control vector isolated from the bone marrow of recipient mice eight weeks after transplantation. The bone marrow cells were analysed by flow cytometry. \* $p < 0.05$ , \*\* $p < 0.01$  (unpaired t-test),  $n = 3$ .

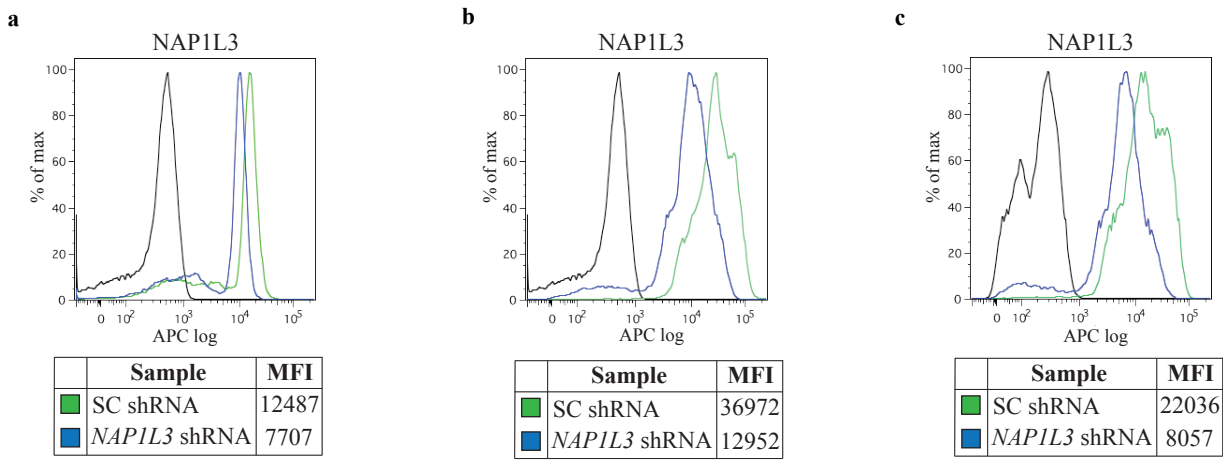

**Supplementary Figure 3. shRNA-mediated downregulation results in significant reduction in protein levels of NAP1L3.**

Three independent flow cytometry plots showing quantification of intracellular NAP1L3 protein levels from sorted (Lin-CD34+CD38-) UCB HSCs transduced with an shRNA vector against NAP1L3 (*NAP1L3* shRNA) or a control vector (SC shRNA). The mean of the MFI of the three independent experiments are shown in Figure 3B.

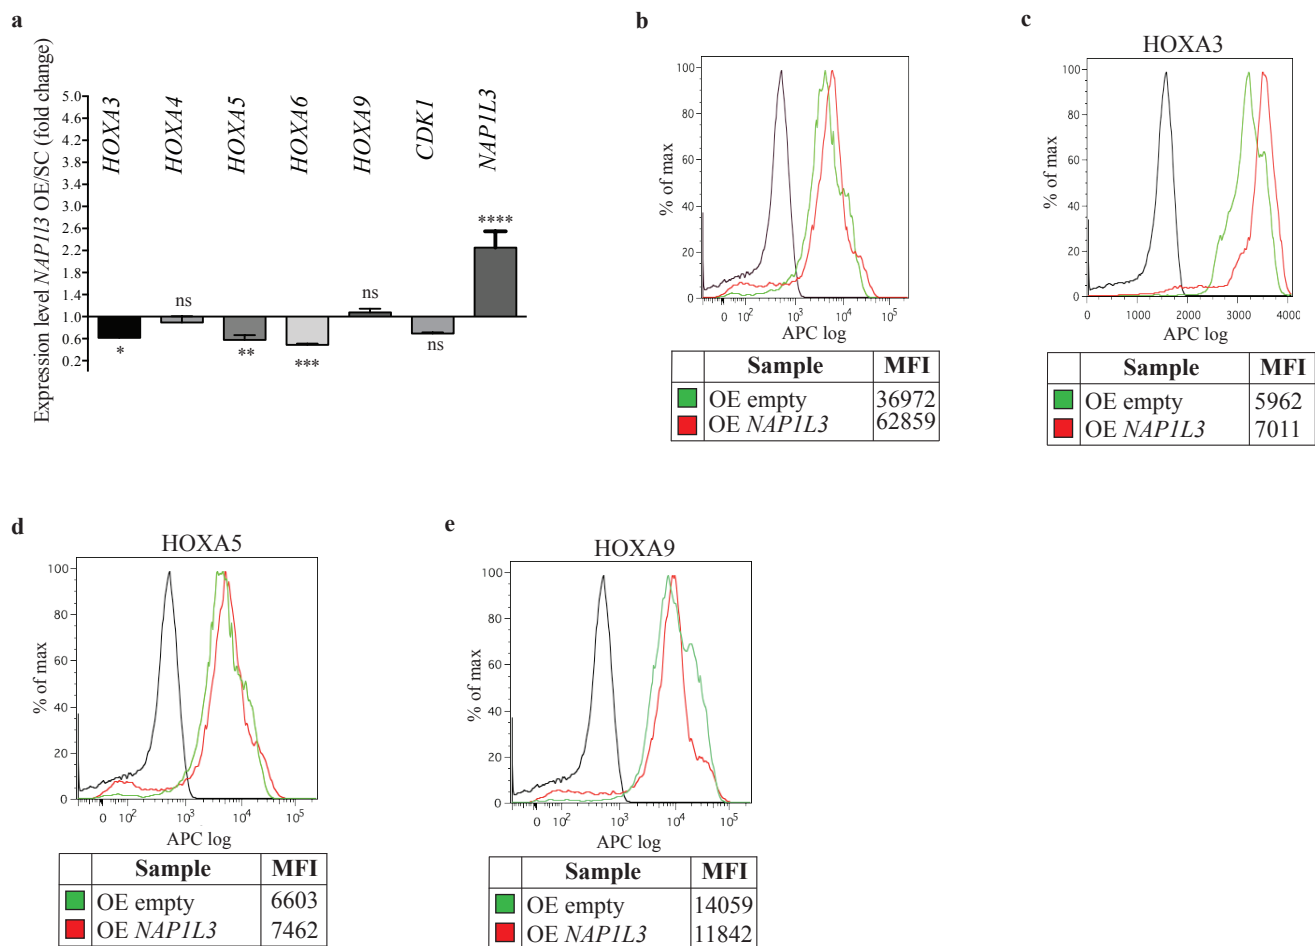

**Supplementary Figure 4. Enforced expression of *NAP1L3* do not affect expression of *HOXA* genes.**

**A.** qPCR analysis of mRNA levels of genes showing changes in expression in RNA-Seq data of CD34+ HSPC UCBs cells transduced with a lentiviral vector expressing *NAP1L3* (OE *NAP1L3*), relative to control cells transduced with an empty vector (OE empty vector), 72 hours post transduction. The data is represented as the mean  $\pm$  s.e.m., ns= non significant, \* $p < 0.05$ , \*\* $p < 0.01$ , \*\*\* $p < 0.0015$  (unpaired t-test),  $n = 3$ . **B-E.** Flow cytometric quantification of mean fluorescence intensity (MFI) of intracellular *NAP1L3* (B), *HOXA3* (C), *HOXA5* (D) and *HOXA9* (E), protein levels, of CD34+ HSPC UCBs cells transduced with shRNA against *NAP1L3* or cells transduced with control vectors, 72 hours post transduction.
